# Supplementary material
Source: PubMed Central journal article supplement (PMC7738197)
Supplement: NIHMS1648947-supplement-Supplementary_figures_and_tables.pdf [file NIHMS1648947-supplement-Supplementary_figures_and_tables.pdf]

**A Panel 1**

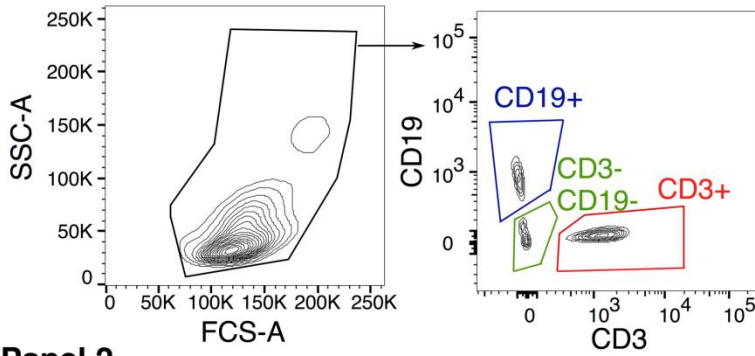

**Panel 2**

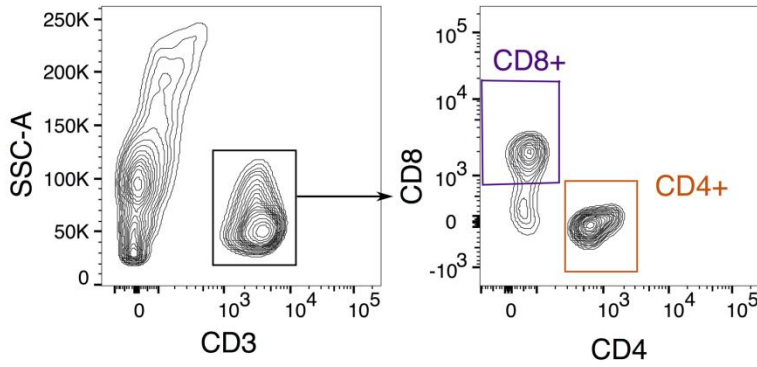

**B**

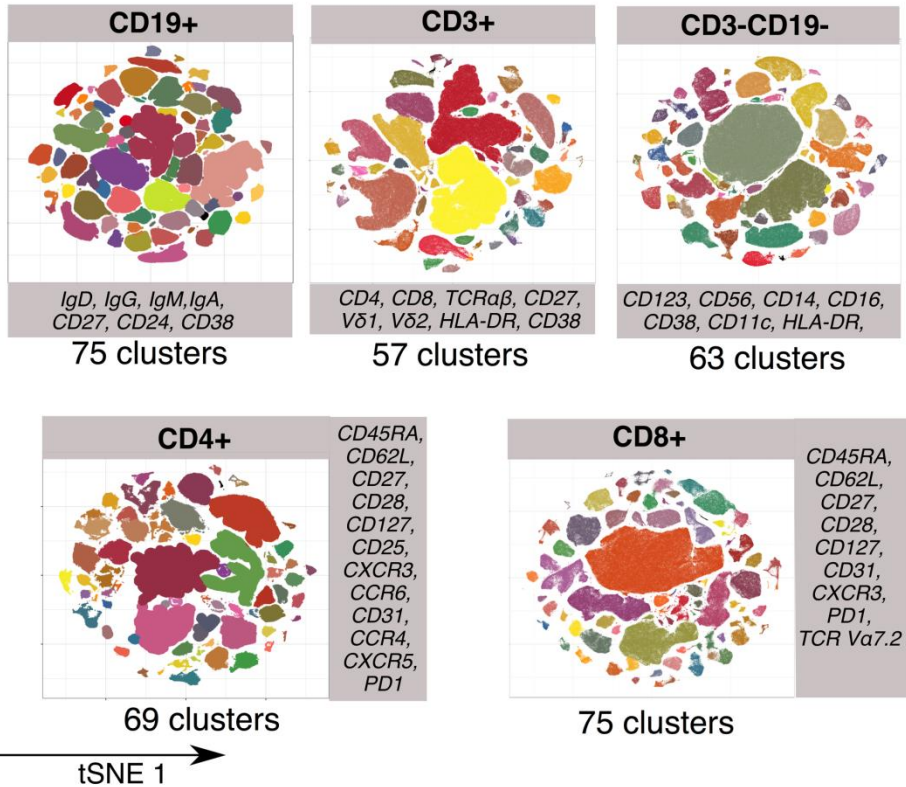

**Fig. S1. Pregating of cell types for tSNE.**

A) Representative flow cytometry plots for the five bulk populations analyzed by tSNE: CD3<sup>+</sup> T cells, CD19<sup>+</sup> B cells, CD4<sup>+</sup> T cells, CD8<sup>+</sup> T cells, and CD3<sup>-</sup>CD19<sup>-</sup> leukocytes. Cells were stained with antibody panels indicated in table S2. From panel 1, CD3<sup>+</sup>, CD19<sup>+</sup> and CD3<sup>-</sup>CD19<sup>-</sup> populations were identified from single, live leukocytes on the basis of CD3 and CD19 expression. From panel 2, CD4<sup>+</sup> and CD8<sup>+</sup> cells were identified from single, live lymphocytes that were CD3<sup>+</sup> and side scatter area (SSC-A) low. B) Representative tSNE plots with DBSCAN-defined clusters for 5 bulk populations from immunophenotyping. Colors represent discrete clusters, the markers used for clustering each population are shown in grey boxes, and the number of clusters for each bulk population is shown below each plot (n = 336 total clusters).

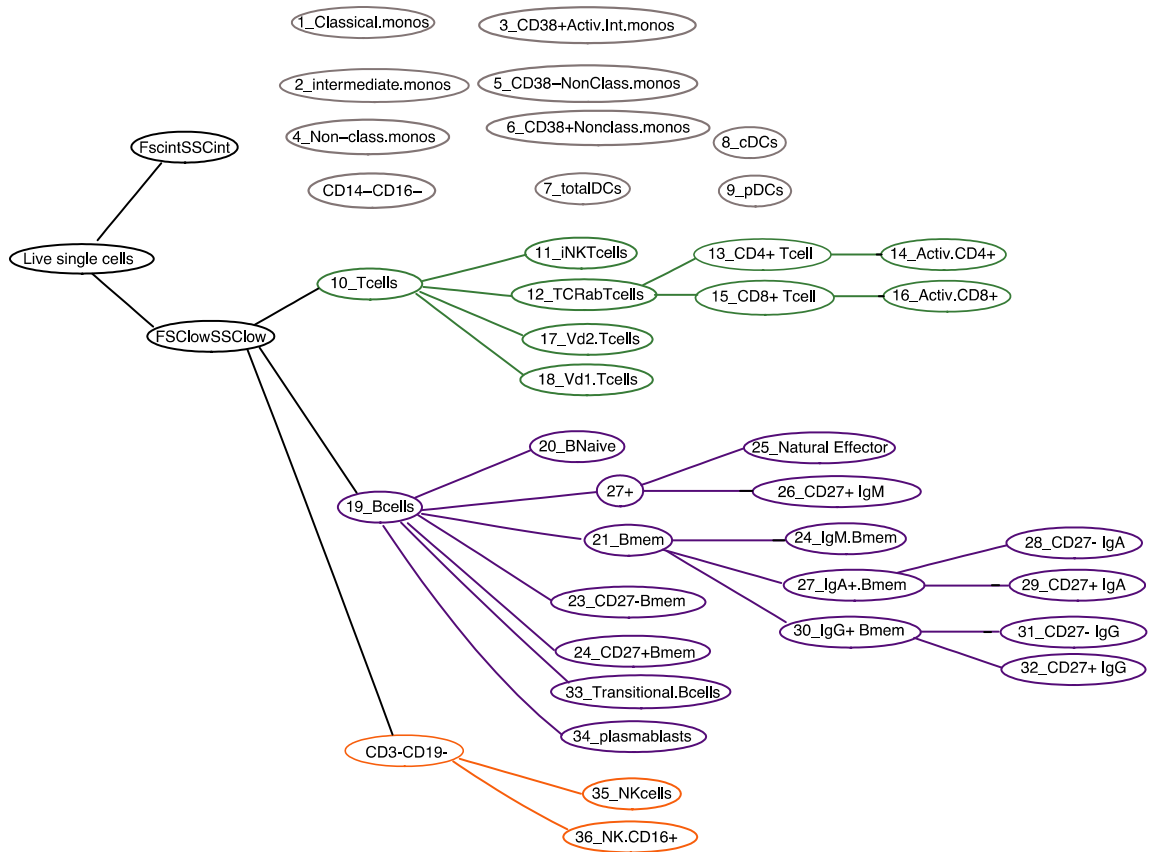

**Fig. S2. Gating hierarchy panel 1.**

The gating hierarchy for cell subsets defined using Panel 1. ‘Live single cells’ was the starting population. Circles represent the cell subsets, and the numbers correspond to the representative flow cytometry plots (fig. S4) and subset definitions (table S3). The colors correspond to those used in fig. S4.

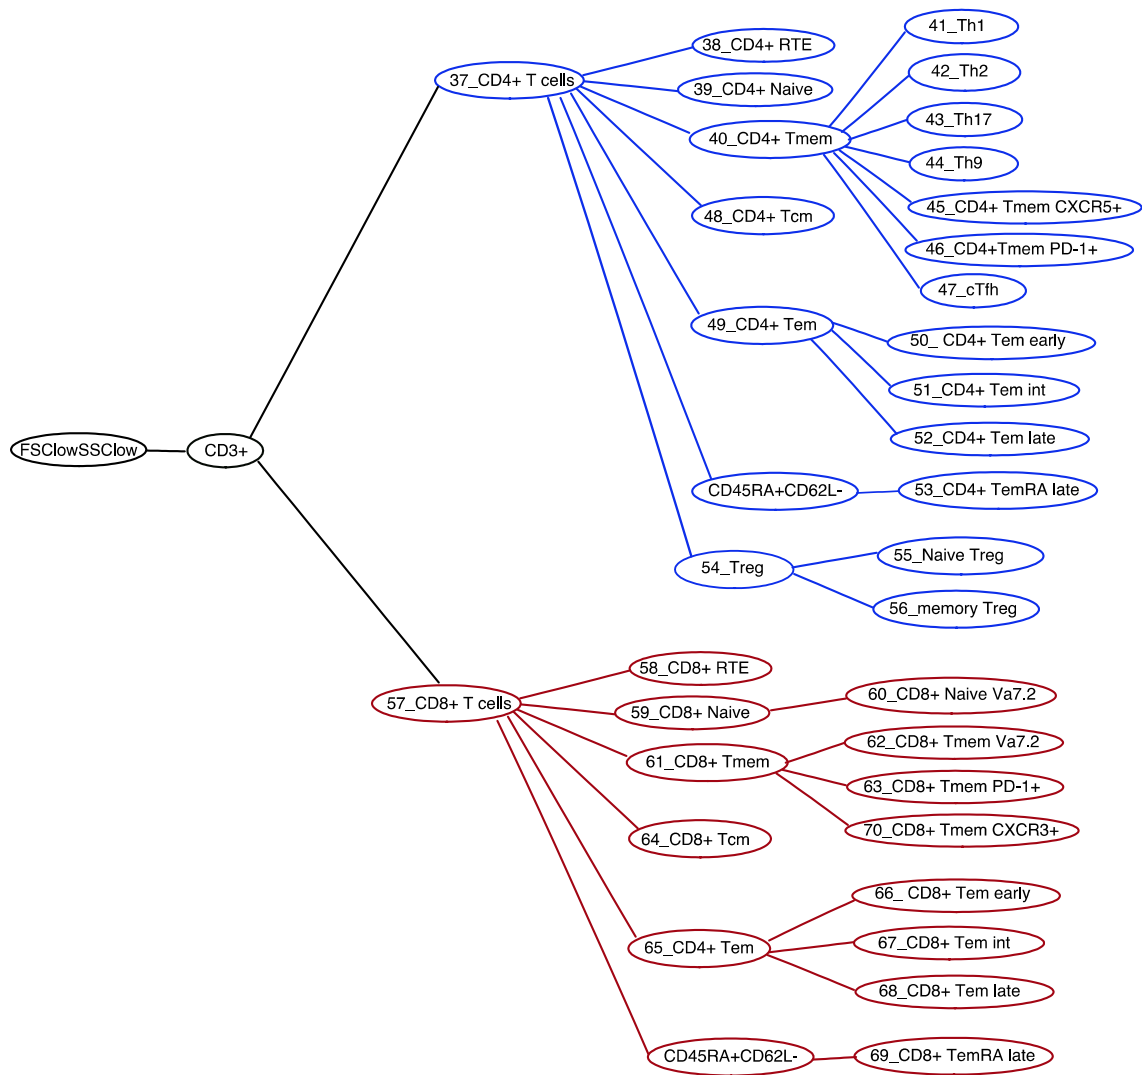

**Fig. S3. Gating hierarchy panel 2.**

The gating hierarchy for cell subsets defined using Panel 2. ‘Live single cells’ was the starting population. Circles represent the cell subsets, and the numbers correspond to the representative flow cytometry plots (fig. S5) and subset definitions (table S4). The colors correspond to those used in fig. 5.

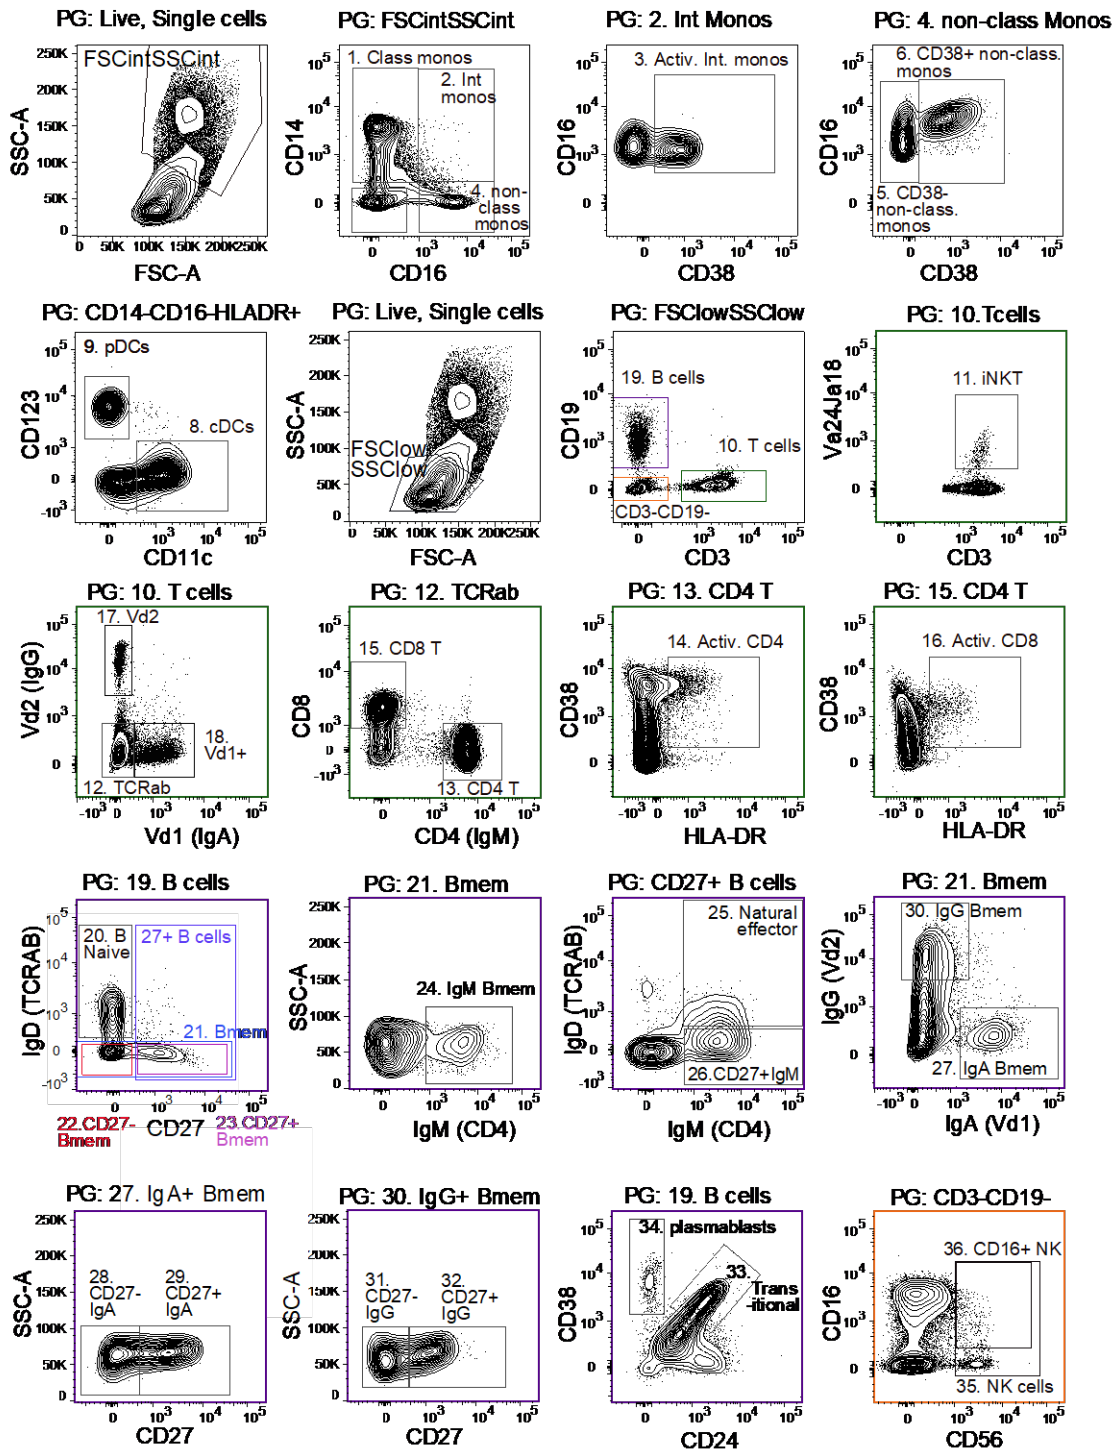

**Fig. S4. Representative flow plots panel 1.**

Representative flow cytometry plots for manually gated cell subsets from antibody panel 1. Parent gate (PG) listed above each plot describes the parental population (see also fig. S2 and table S3). The plot outline colors correspond to those used in fig. S3.

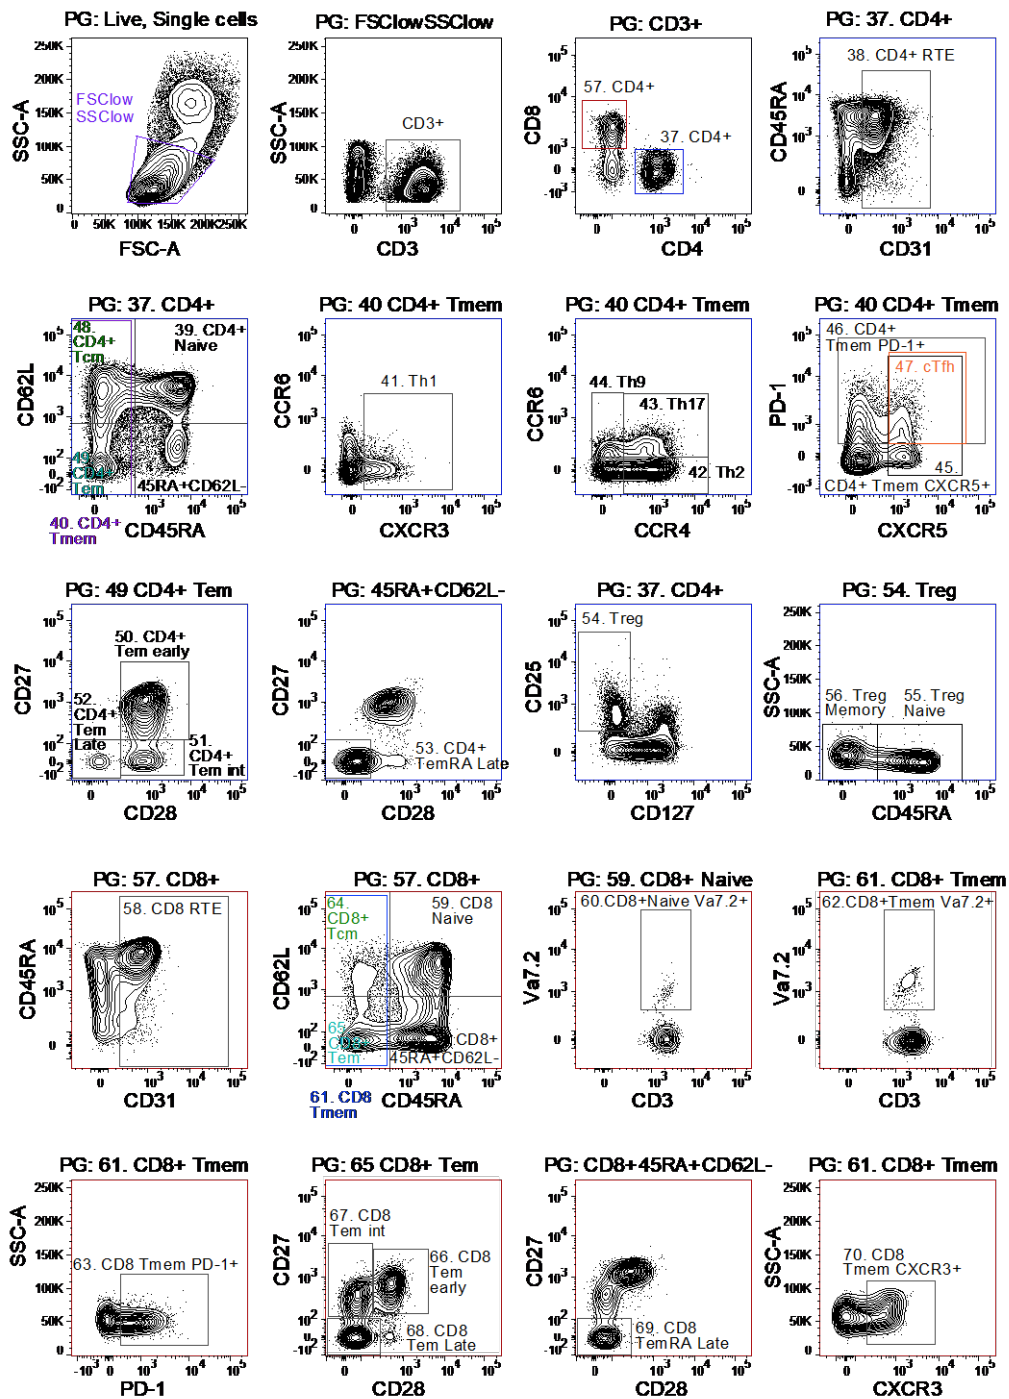

Fig. S5. Representative flow plots panel 2.

Representative flow cytometry plots for manually gated cell subsets from antibody panel 1. Parent gate (PG) listed above each plot describes the parental population (see also fig. S3 and table S4). The plot outline colors correspond to those used in fig. S4.

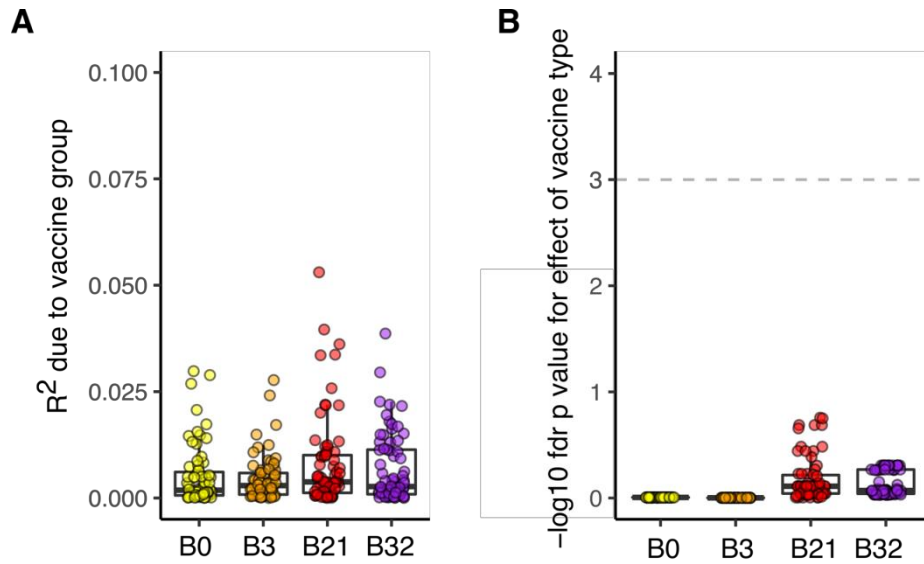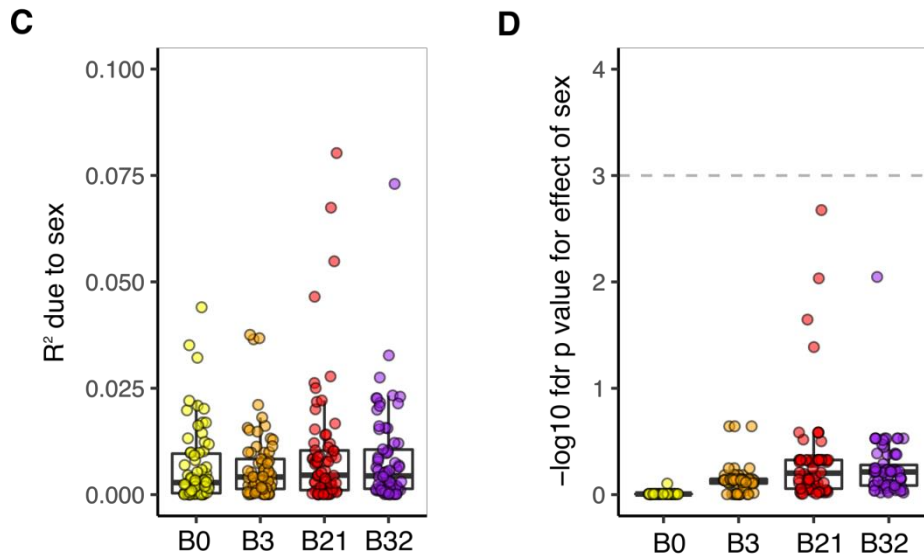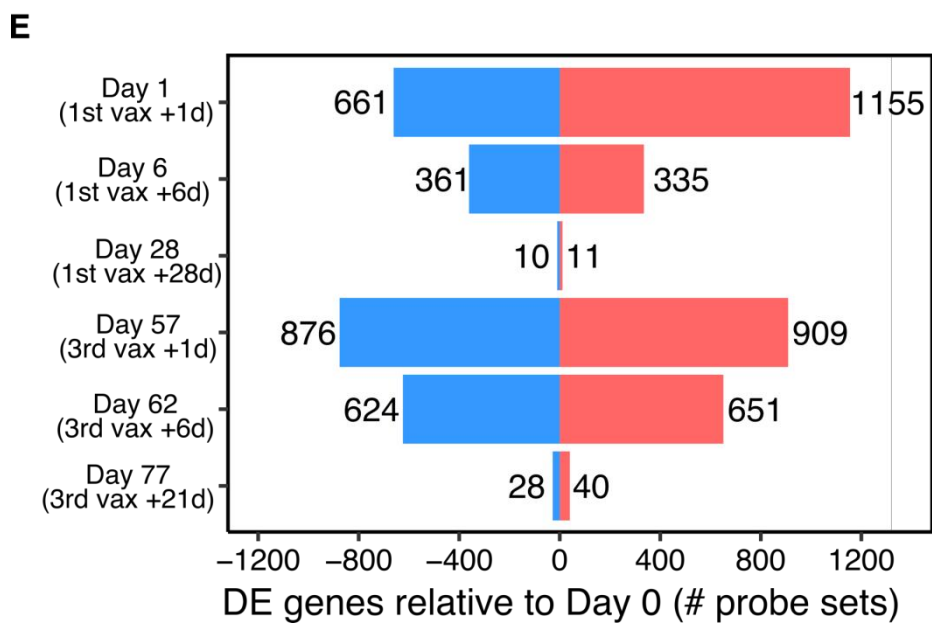

**Fig. S6. No vaccine-induced changes are detectable 1 month after vaccination.**

The proportion of variance (A) and corresponding p-value (B,  $-\log_{10}$  fdr adjusted) attributed to vaccine group (R3R, R3C, C3C) at each time point for each cell type was determined by linear regression (modelled as cell type  $\sim$  vaccine group + sex+ subject ID). The proportion of variance (C) and corresponding p-value (D,  $-\log_{10}$  fdr adjusted) attributed to sex (male or female) at each time point for each cell type was determined by linear regression (modelled as cell type  $\sim$  sex+ subject ID). In B and D any population with an adjusted p-value of less than 0.01 were deemed significantly different, the dotted line indicates  $p_{adj}=0.001$ . E) Analysis of microarray data from Kazmin et al (13), in which gene expression was measured at day 0, 1, 6 and 28 days after the first RTS,S vaccination, and days 1 (57), 6 (62) and 21 (77) days after the third vaccination (n=14 individuals at each time-point). Differential gene expression was determined relative to pre-vaccination (Day 0 or Day 56) using Limma to fit a linear model to each gene, and probe sets with fdr-adjusted p-values of  $<0.01$ , and a  $\log_2$  fold change of  $>1$  or  $<-1$  are shown. The number of probe sets that were upregulated (red) or downregulated (blue) at each time-point are indicated on the graph.



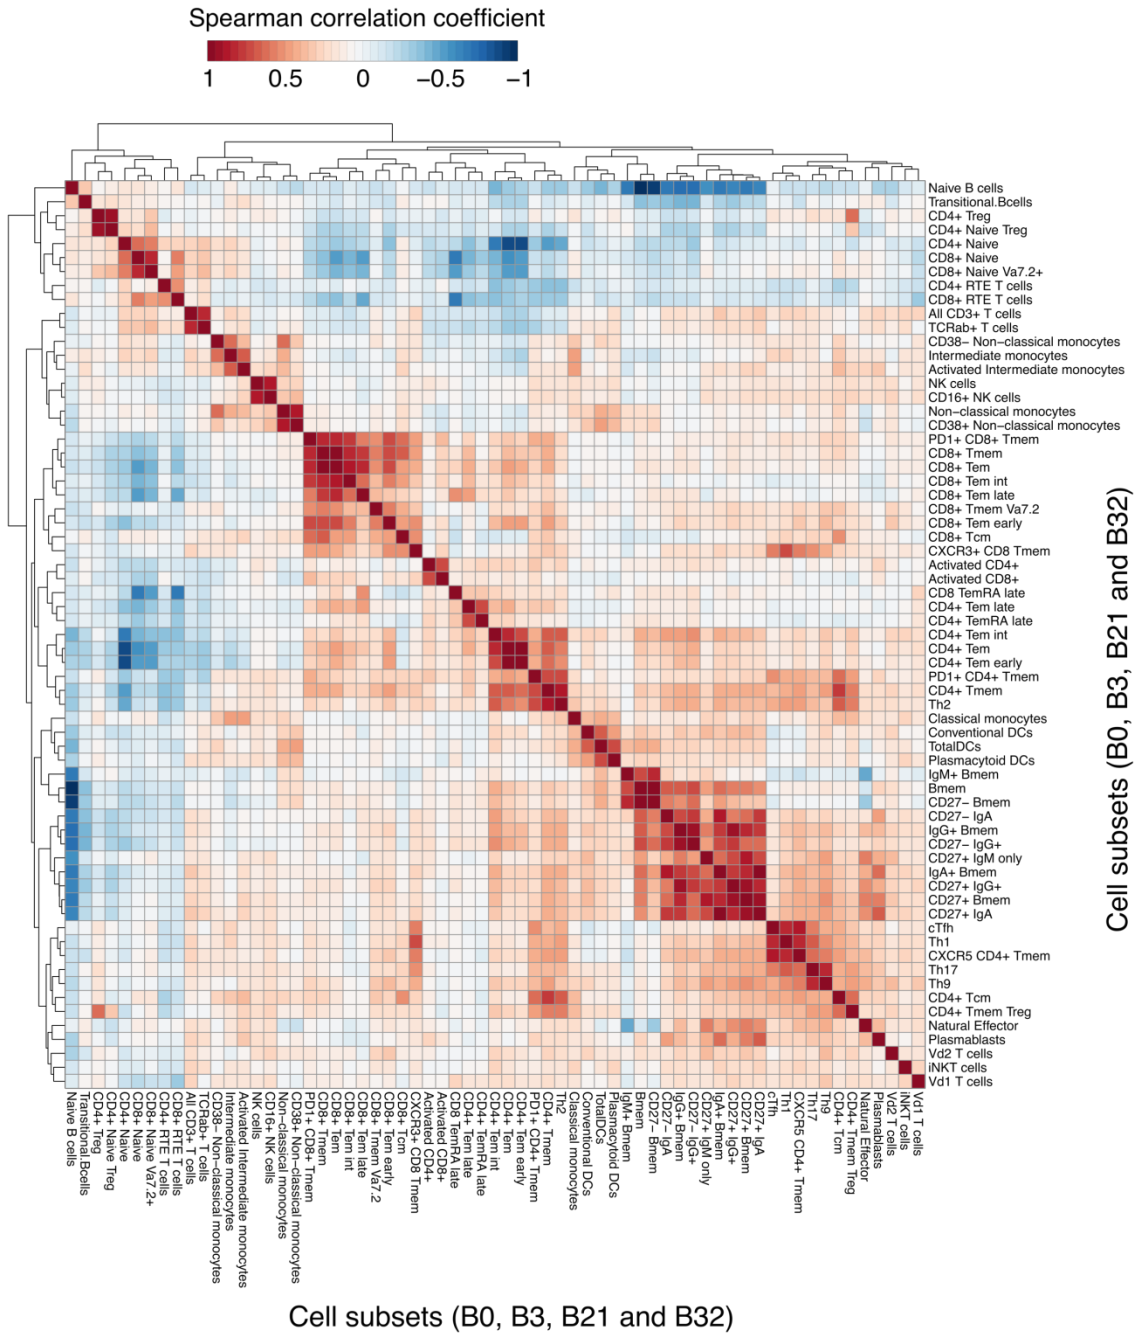

**Fig. S7. Strong correlations observed within related cell types.**

Spearman correlation coefficients for cell subsets (n=65, as a % of their parent population) including samples from all time-points in children from Tanzanian and Mozambique (n=718). All correlations were statistically significant ( $p < 0.001$ ).

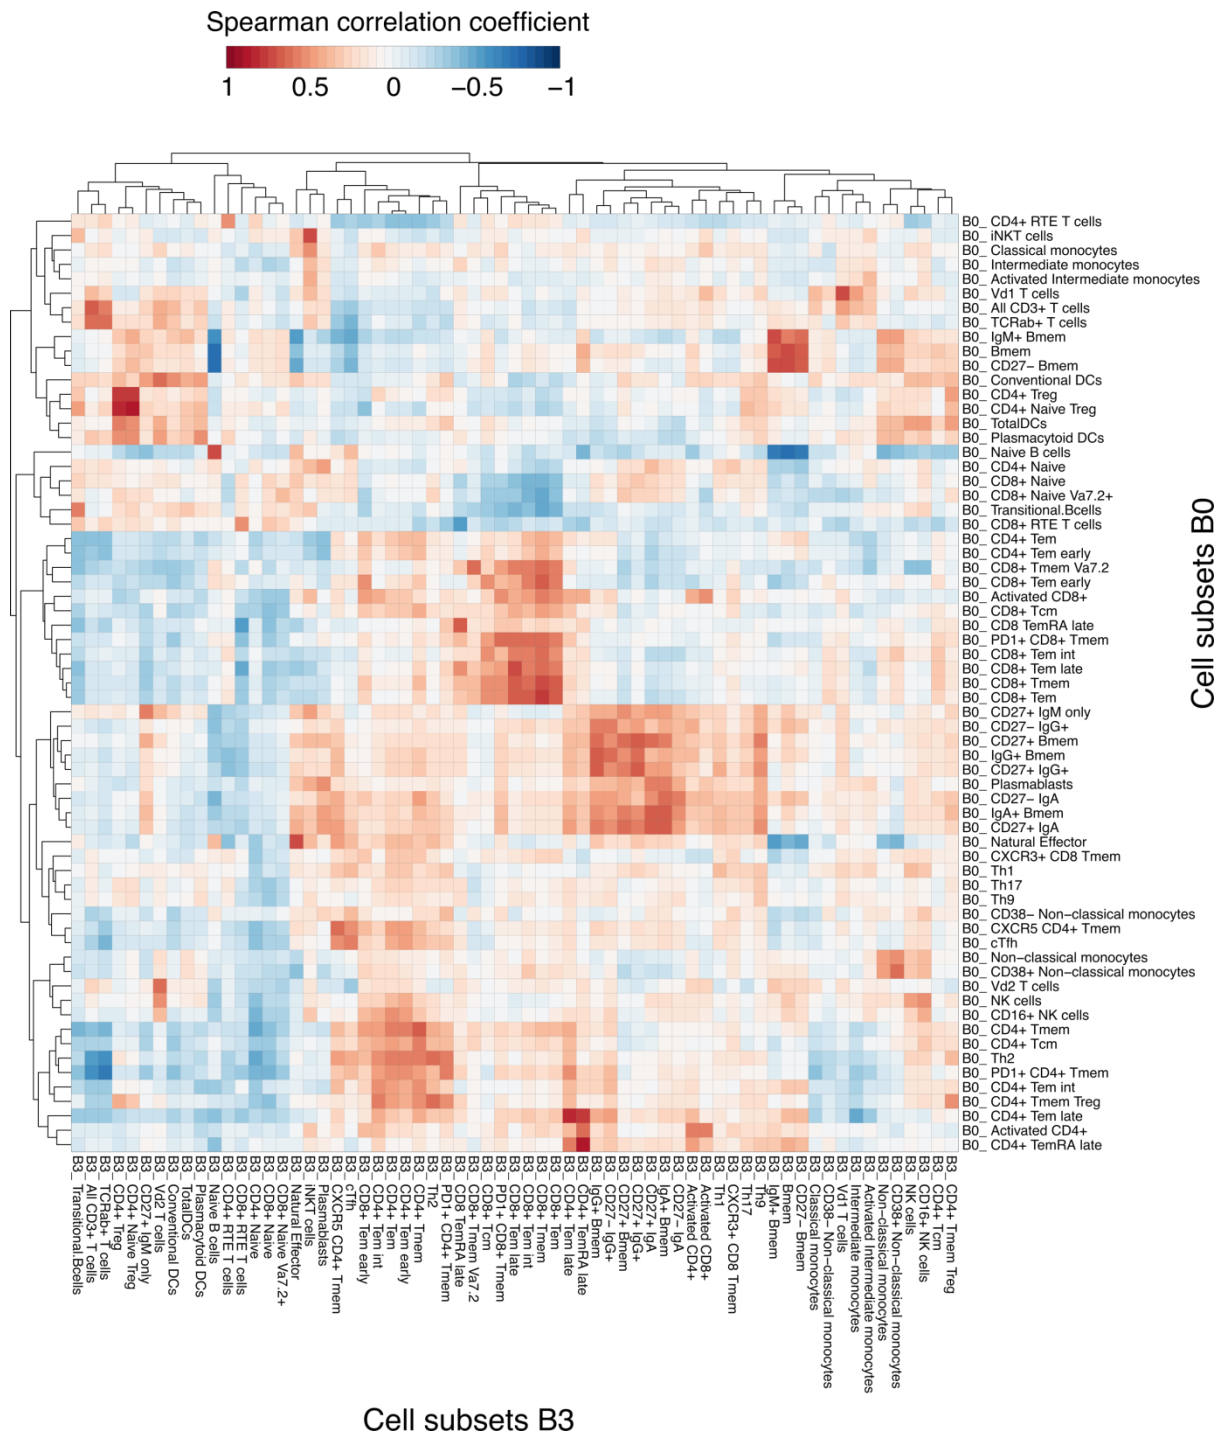

**Fig. S8. Cell subset frequency correlations between baseline and B3 time points.**

Spearman correlation coefficients for cell subsets ( $n=65$ , as a % of their parent population) including participants with samples from baseline (B0) and 3 months into the trial (B3) in children from Tanzanian and Mozambique ( $n=120$ ). All correlations were statistically significant ( $p < 0.001$ ).

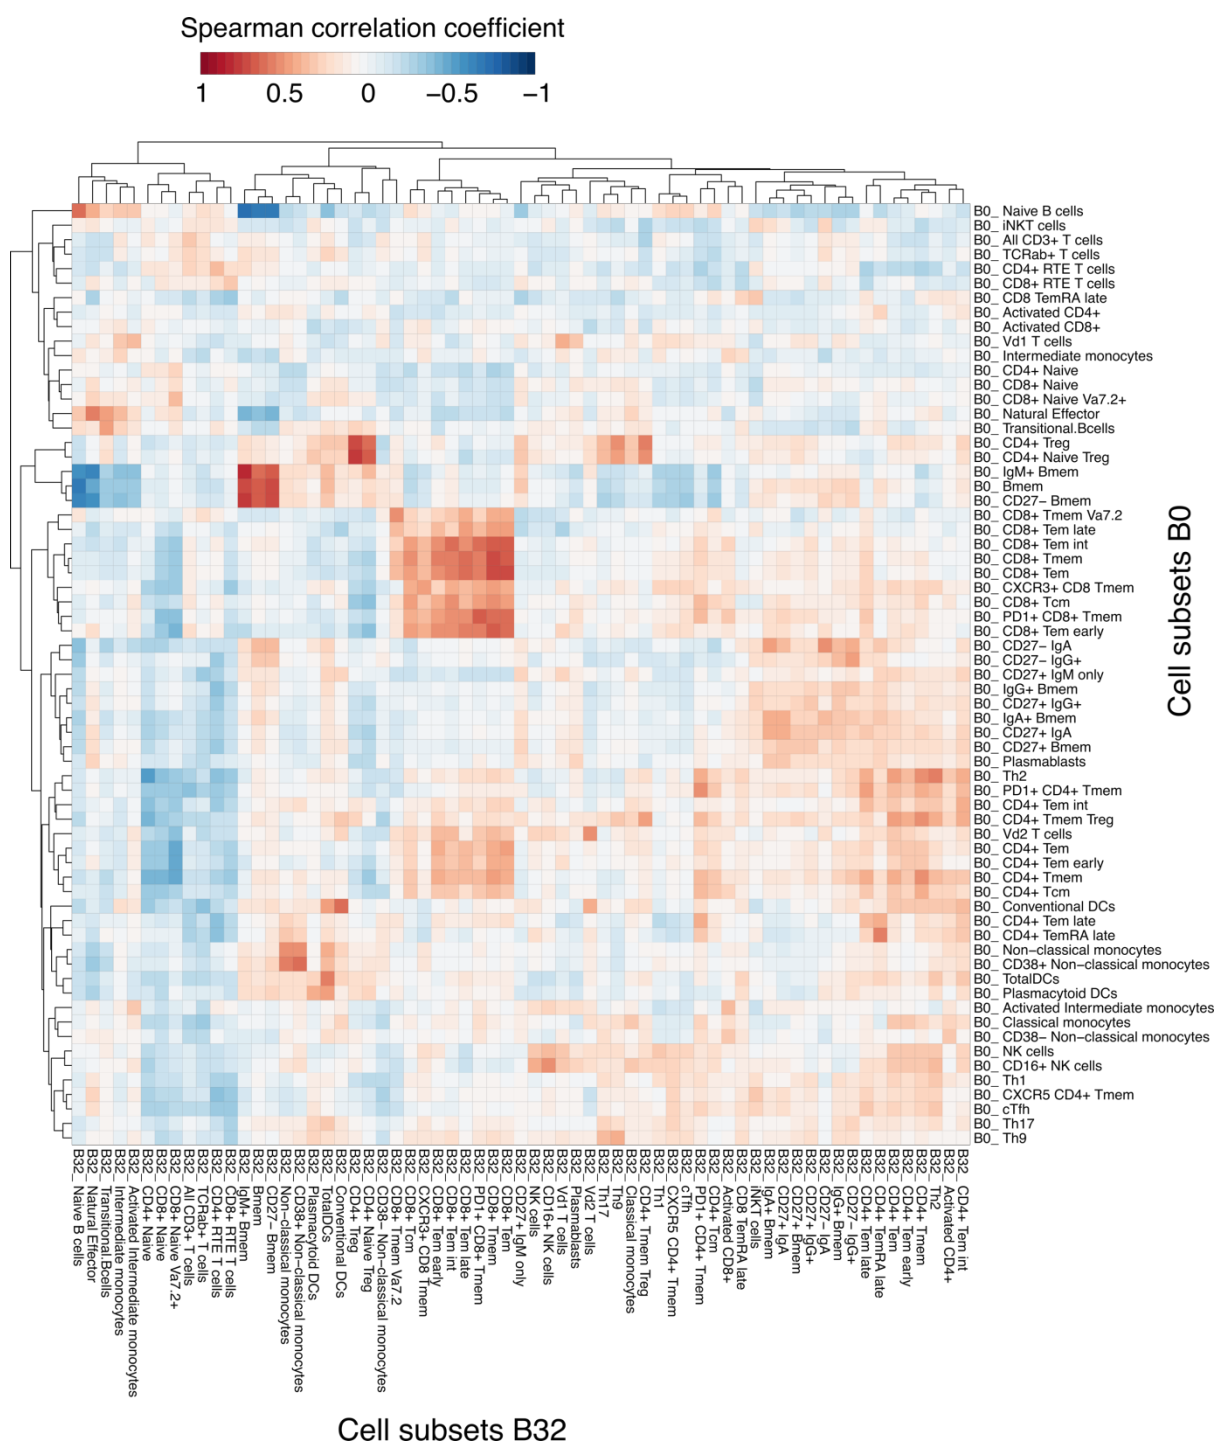

**Fig. S9. Cell subset frequency correlations between baseline and B32 time points.**

Spearman correlation coefficients for cell subsets (n=65, as a % of their parent population) including samples from baseline (B0) and 32 months into the trial (B32) in children from Tanzanian and Mozambique (n=120). All correlations were statistically significant ( $p < 0.001$ ).

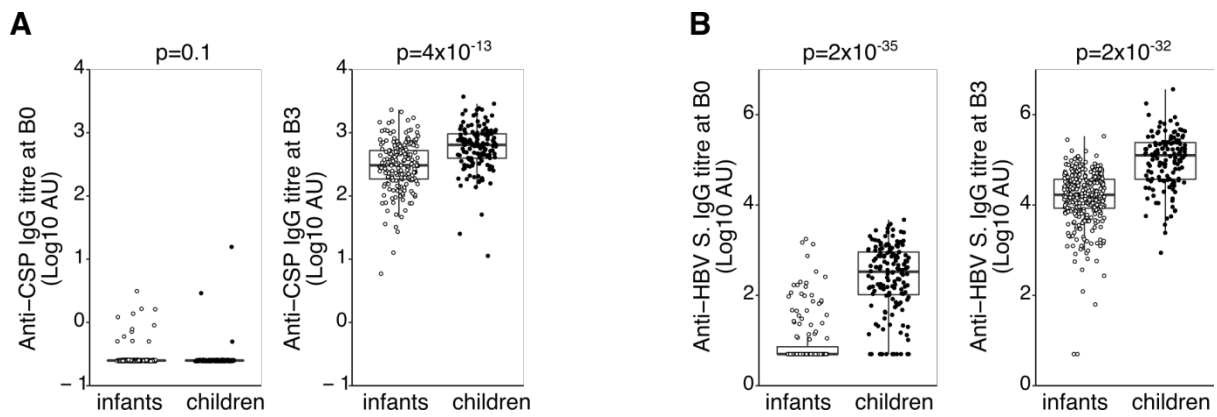

**Fig. S10. Anti-CSP and anti-HBV.S IgG titers before and after vaccination in infants and children from Mozambique.**

IgG titers for infants and children from Mozambique at B0 and B3. IgG titers measured by ELISA as Log<sub>10</sub> of arbitrary units (AU) are shown for (A) CSP and (B) HBV.S antigens. P-values determined using Mann-Whitney test.

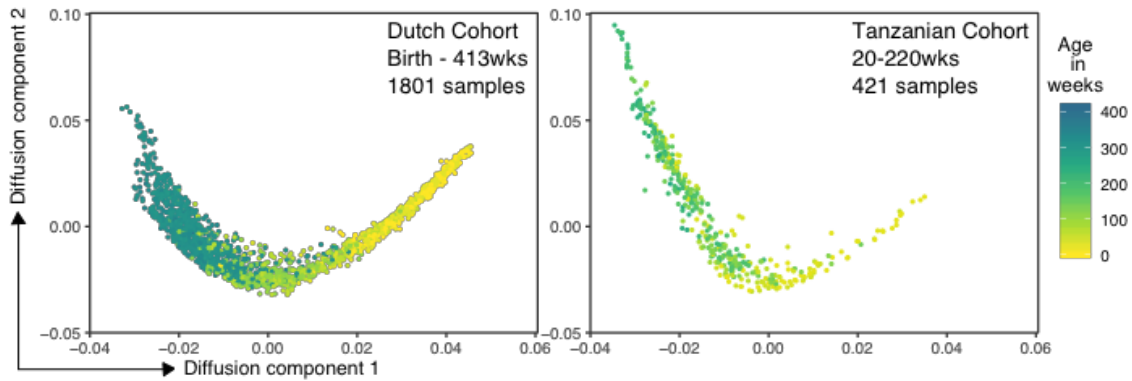

**Fig. S11. Distribution of participant age along the diffusion-pseudotime trajectory.**

Diffusion-map dimensionality reduction of all Dutch and Tanzanian samples using scaled cellular frequencies and the diffusion-pseudotime algorithm. The trajectory was built with 2222 samples as shown in Fig. 5, and shown here are the diffusion component co-ordinates separated for each study. Each dot represents a sample, color represents the corresponding age in weeks for each sample.

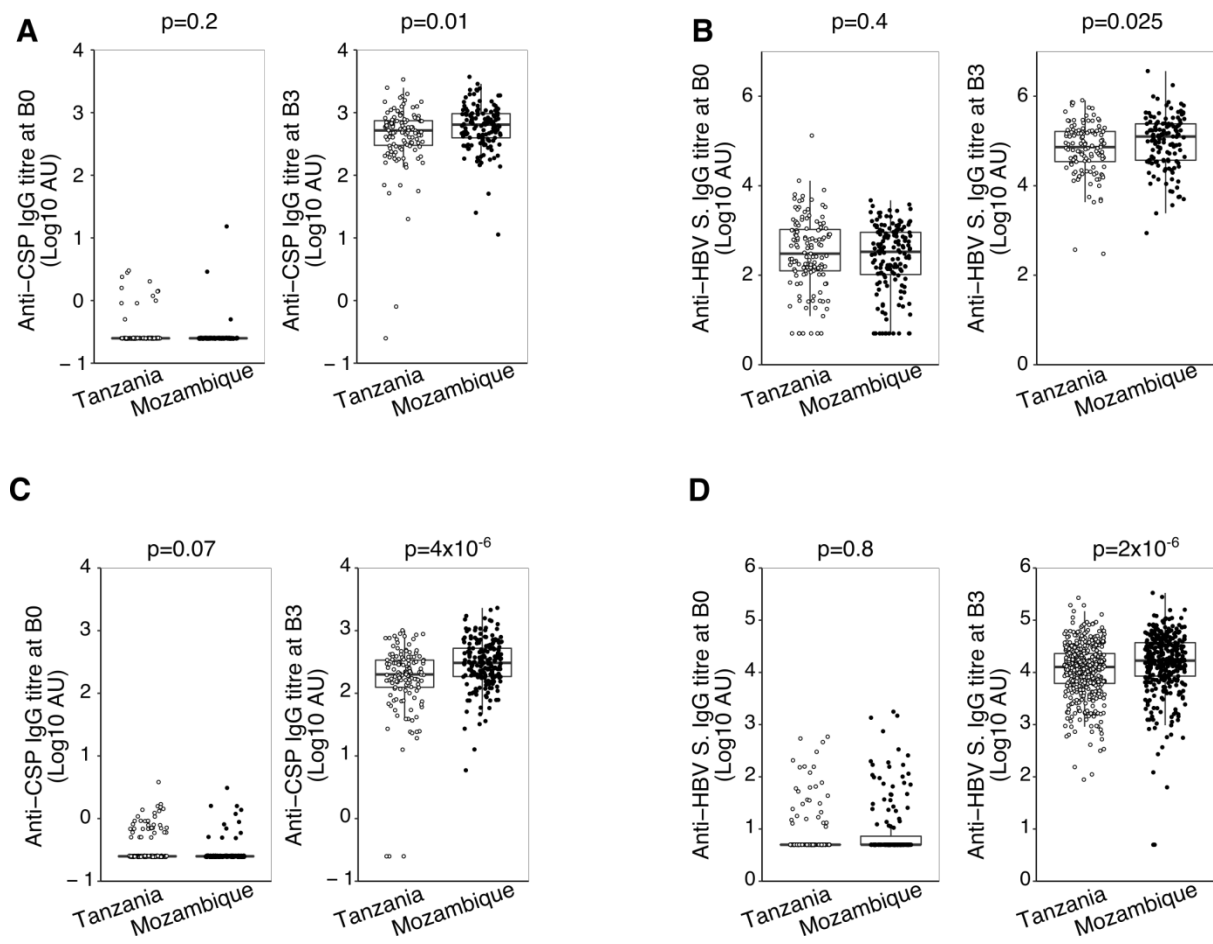

**Fig. S12. Anti-CSP and anti-HBV.S IgG titers before and after vaccination in children from Tanzania and Mozambique.**

IgG titers measured by ELISA as Log<sub>10</sub> of arbitrary units (AU) are shown for (A, C) CSP and (B, D) HBV.S antigens. A-B) IgG titers for children from Tanzania and Mozambique at B0 and B3. C-D) Titers for infants from Tanzania and Mozambique at B0 and B3. P-values determined using Mann-Whitney test.

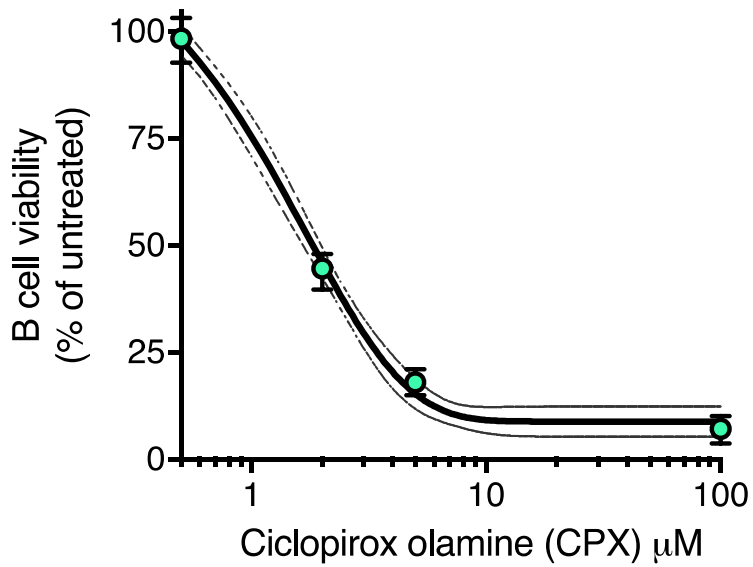

**Fig. S13. Dose-dependent toxicity of ciclopirox olamine on B cells in culture.**

Purified B cells from adult UK volunteers were stimulated in culture media containing IL-21 and CD40L for 5 days. CPX was added to cultures after 24 hours at the concentrations indicated ranging from 500nM – 100 $\mu\text{M}$  and cell viability assessed by flow cytometry and staining with antibody panels containing a viability dye. Representative of 1 experiment, 6 biological replicates.

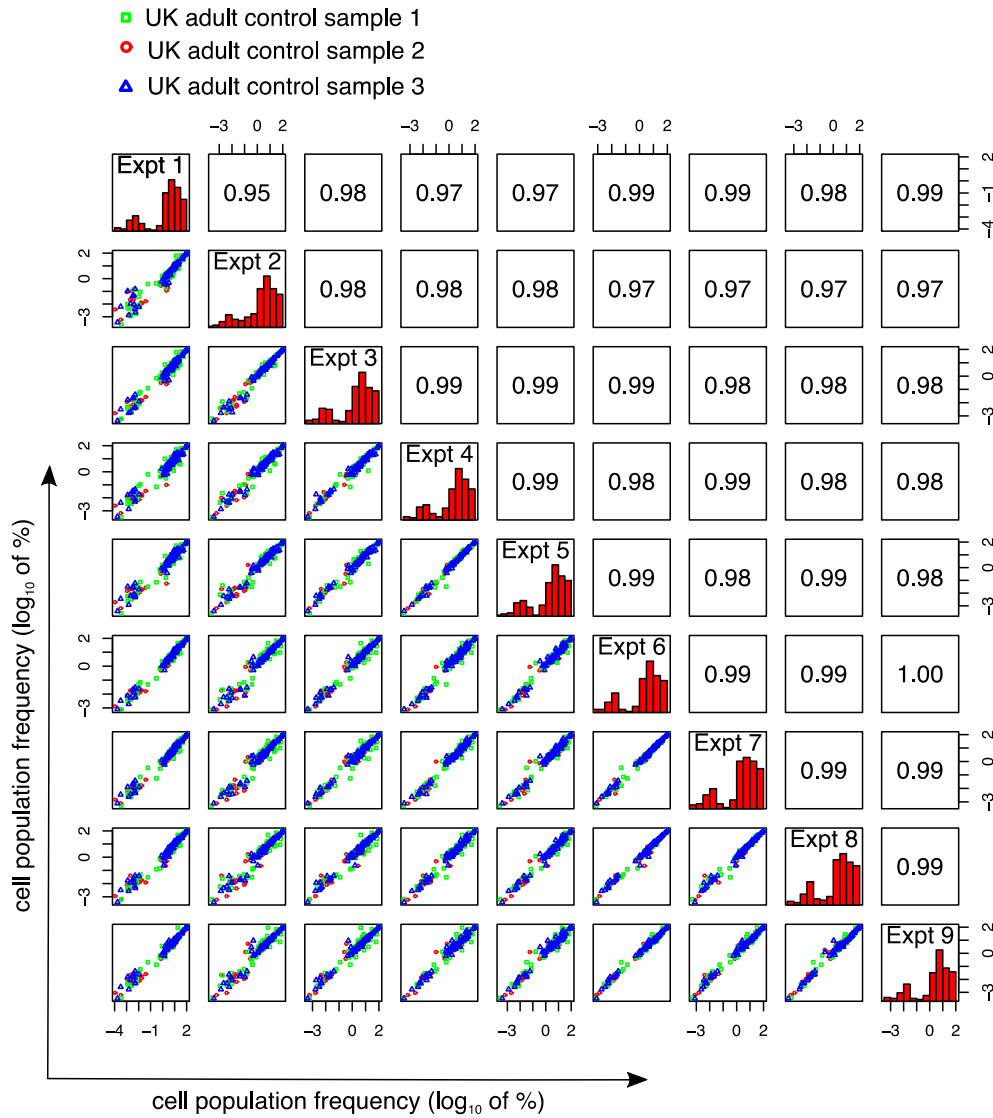

**Fig. S14. Highly reproducible flow cytometry data between experiments.**

Three UK adult volunteer PBMC samples were included in each experiment to measure batch effects. Shown here are the correlations between the 70 manually gated cell types (% of lymphocytes  $\log_{10}$  transformed) between each experiment ( $n=270$  per experiment). Symbol color and shape represent the different UK adult samples used. The red histograms represent the distribution of cell subset frequency in each experiment. All experiments were highly correlated ( $p<0.0001$ ) and the numbers in the upper quadrant represent the Pearson correlation coefficient ( $R^2$ ) for each comparison.



**Table S1. Participant characteristics.**

|                                       | <b>Study participant samples [n]</b> |         |          |
|---------------------------------------|--------------------------------------|---------|----------|
| <b>RTS,S Immunophenotyping cohort</b> | Total                                | Infants | Children |
| Both sites                            | 214                                  | 43      | 169      |
| Mozambique                            | 98                                   | 43      | 55       |
| Mozambique Female                     | 46                                   | 20      | 26       |
| Tanzania                              | 116                                  | 0       | 116      |
| Tanzania Female                       | 52                                   | 0       | 52       |
| <b>RTS,S Serology Cohort</b>          |                                      |         |          |
| Both sites                            | 458                                  | 198     | 260      |
| Mozambique                            | 335                                  | 198     | 137      |
| Tanzania                              | 123                                  | 0       | 123      |

**Table S2. Consolidated Standards of Reporting Trials table.**

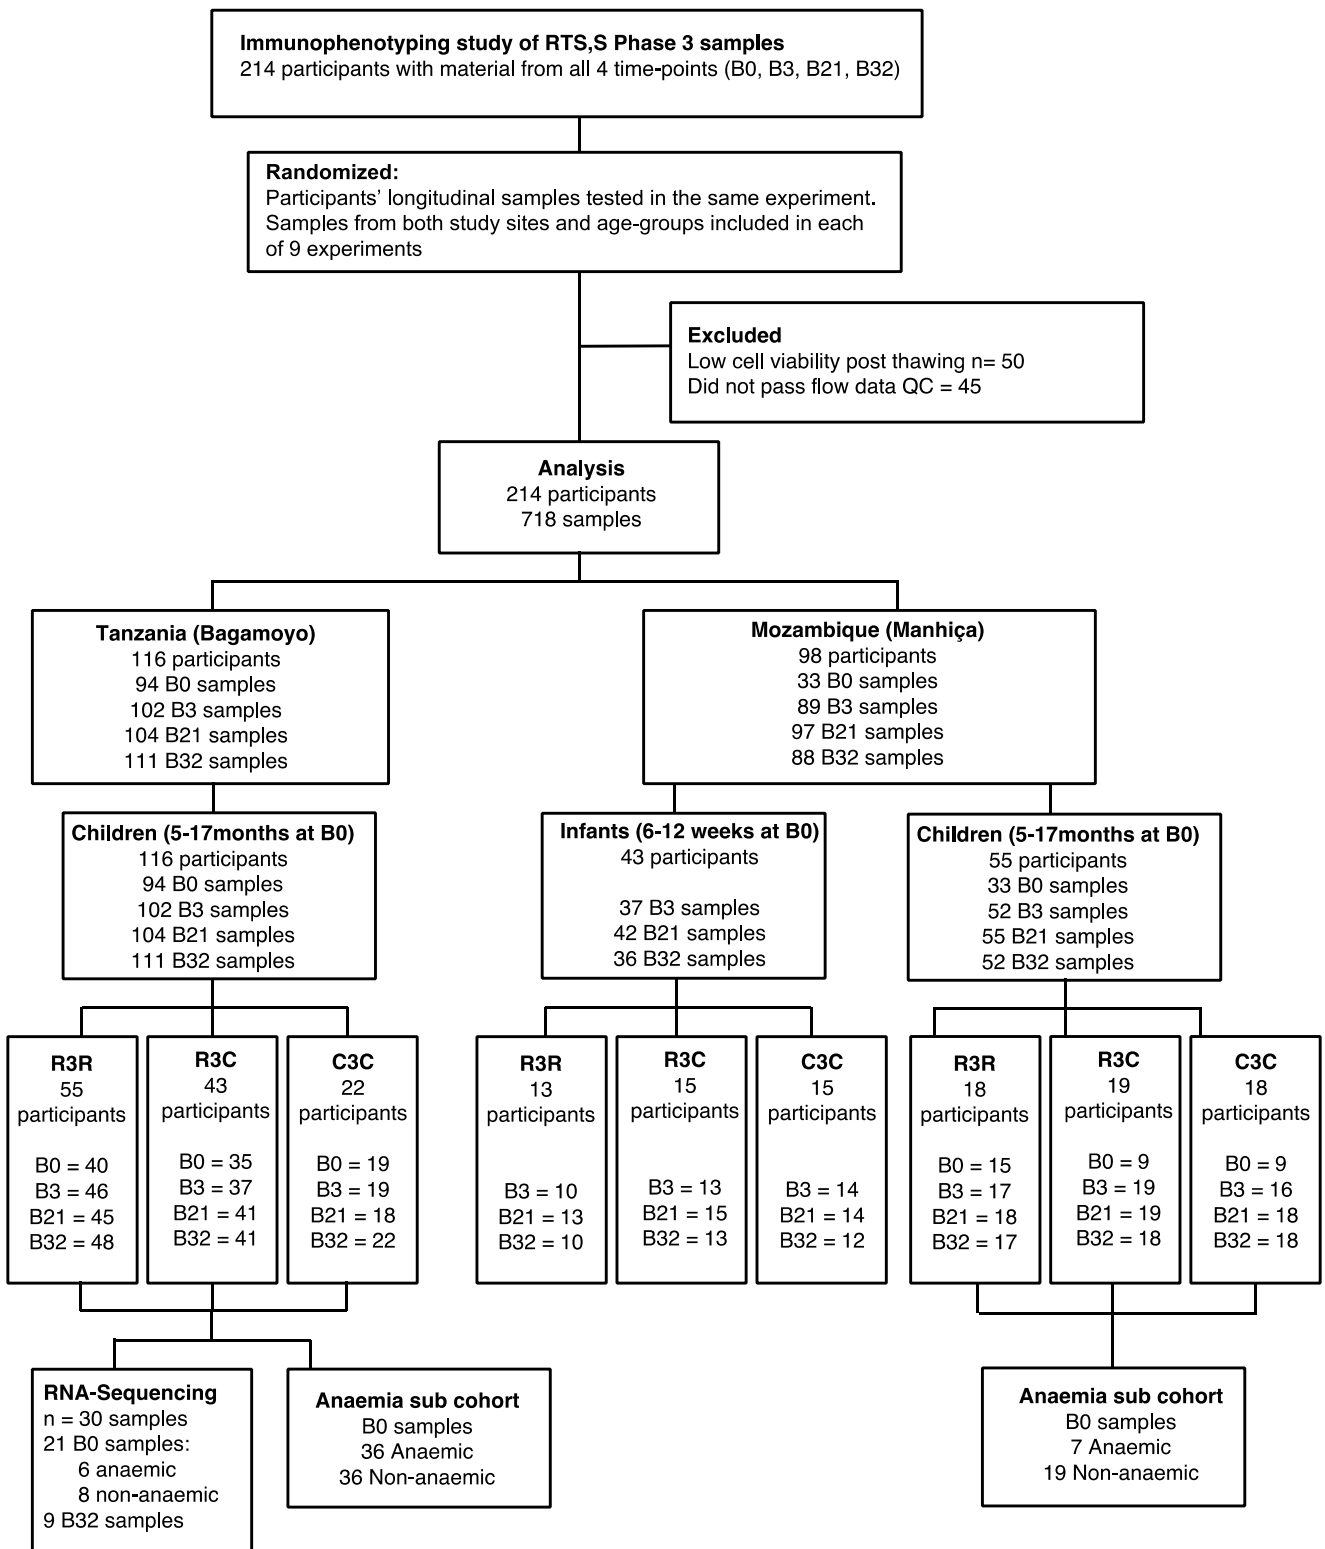

**Table S3. Antibody panels.**

| Panel    | marker           | clone     | fluo      | company          | Catalogue number |
|----------|------------------|-----------|-----------|------------------|------------------|
| 1, 2, 3* | viability dye    | n/a       | eFluor780 | Thermo Fisher    | 65-0865-18       |
| 1, 2, 3* | CD32 (FcR Block) | 6C4       | n/a       | ThermoFisher     | 16-0329-85       |
| 1& 2     | CD3              | UCHT1     | BUV395    | BD Biosciences   | 563546           |
| 1        | CD19             | SJ25C1    | BUV496    | BD Biosciences   | 564655           |
| 1, 3*    | IgD              | IA6-2     | BUV737    | BD Biosciences   | 564687           |
| 1        | TCRab            | T10B9     | BUV737    | BD Biosciences   | 564725           |
| 1        | vδ1              | TS8.2     | FITC      | Thermo Fisher    | TCR2730          |
| 1        | IgA              | goat poly | FITC      | Southern biotech | 2050-02          |
| 1        | CD4              | SK3       | Percpe710 | ThermoFisher     | 46-0047-42       |
| 1        | IgM              | SA-DA4    | Percpe710 | ThermoFisher     | 46-9998-42       |
| 1        | CD38             | HIT2      | BV421     | Biolegend        | 303526           |
| 1        | CD16             | 3G8       | BV480     | BD Biosciences   | 566108           |
| 1        | CD24             | ML5       | BV605     | Biolegend        | 311124           |
| 1, 3*    | CD27             | O323      | BV711     | Biolegend        | 302834           |
| 1        | CD11C            | 3.9       | BV786     | Biolegend        | 301644           |
| 1        | vδ2              | B6        | PE        | Biolegend        | 331408           |
| 1        | IgG              | goat poly | PE        | Southern biotech | 2040-09          |
| 1        | CD123            | 6H6       | PE*Dazzle | Biolegend        | 306034           |
| 1        | CD56             | CMSSB     | PeCy5.5   | ThermoFisher     | 35-0567-42       |
| 1        | CD14             | 61D3      | PeCy7     | ThermoFisher     | 25-0149-42       |
| 1        | Va24-Ja18        | 6B11      | Pecy7     | Biolegend        | 342912           |
| 1        | HLADR            | LN3       | APC       | ThermoFisher     | 17-9956-42       |
| 1& 2     | CD8              | RPA-T8    | A700      | ThermoFisher     | 56-0088-42       |
| 2        | CD4              | SK3       | BUV496    | BD Biosciences   | 564651           |
| 2        | CD45RA           | HI100     | BUV737    | BD Biosciences   | 564442           |
| 2        | CD28             | CD28.2    | BB515     | BD Biosciences   | 555726           |
| 2        | CD31             | WM-59     | PerCpe710 | ThermoFisher     | 46-0319-42       |
| 2        | CXCR3            | 1C6/CXCR3 | BV421     | BD Biosciences   | 562558           |
| 2        | CD62L            | DREG-56   | BV480     | BD Biosciences   | 566174           |
| 2        | CCR4             | L291H4    | BV605     | Biolegend        | 359418           |
| 2        | CD25             | BC96      | BV650     | Biolegend        | 302634           |
| 2        | TCRVa7.2         | 3C10      | BV711     | Biolegend        | 351732           |
| 2        | CCR6             | 11A9      | BV786     | BD Biosciences   | 563704           |
| 2        | CXCR5            | J252D4    | PE        | Biolegend        | 356920           |
| 2        | CD127            | A019D5    | PE*Dazzle | Biolegend        | 351336           |
| 2        | CD27             | O323      | PeCy7     | ThermoFisher     | 25-0279-42       |
| 2        | PD1              | eBioJ105  | APC       | ThermoFisher     | 17-2799-42       |
| 3*       | CD19             | HIB19     | BB515     | BD Biosciences   | 564456           |
| 3*       | CD20             | 2H7       | PECY7     | Biolegend        | 302312           |
| 3*       | CD38             | HIT2      | APC       | eBioscience      | 17-0389-42       |
| 3*       | IRF4             | IRF4.3E4  | PE        | Biolegend        | 646403           |

\* Note: Panel 3 was used to stain in vitro cultured B cells, while Panel 1 and 2 were used with African PBMC samples

**Table S4. Manually gated cell subset definitions panel 1.**

| #  | Population name      | Markers used for manual gating                                           |
|----|----------------------|--------------------------------------------------------------------------|
| 1  | Classical.monos      | FSCintSSCint; CD14+; CD16-                                               |
| 2  | Intermediate.monos   | FSCintSSCint; CD14+; CD16+                                               |
| 3  | CD38+Activ.Int.monos | FSCintSSCint; CD14+; CD16+; CD38+                                        |
| 4  | Non-class.monos      | FSCintSSCint; CD14-; CD16+                                               |
| 5  | CD38-NonClass.monos  | FSCintSSCint; CD14-; CD16+; CD38-                                        |
| 6  | CD38+Nonclass.monos  | FSCintSSCint; CD14-; CD16+; CD38+                                        |
| 7  | Total DCs            | FSCintSSCint; CD14-; CD16-; HLA-DR+                                      |
| 8  | cDCs                 | FSCintSSCint; CD14-; CD16-; HLA-DR+; CD11c+;CD123-                       |
| 9  | pDCs                 | FSCintSSCint; CD14-; CD16-; HLA-DR+; CD11c- ;CD123+                      |
| 10 | T cells              | FSClowSSClow; CD3+ ; CD19-                                               |
| 11 | iNKT cells           | FSClowSSClow; CD3+ ; CD19- ; Va24-Ja18+                                  |
| 12 | TCRab Tcells         | FSClowSSClow; CD3+ ; CD19- ; Vd1- ; Vd2-                                 |
| 13 | CD4+ Tcell           | FSClowSSClow; CD3+ ; CD19- ; Vd1- ; Vd2- ; CD4+ ; CD8-                   |
| 14 | Activ. CD4+          | FSClowSSClow; CD3+ ; CD19- ; Vd1- ; Vd2- ; CD4+ ; CD8- ; HLA-DR+ ; CD38+ |
| 15 | CD8+ Tcell           | FSClowSSClow; CD3+ ; CD19- ; Vd1- ; Vd2- ; CD4- ; CD8+                   |
| 16 | Activ. CD8+          | FSClowSSClow; CD3+ ; CD19- ; Vd1- ; Vd2- ; CD4- ; CD8+ ; HLA-DR+ ; CD38+ |
| 17 | Vd2                  | FSClowSSClow; CD3+ ; CD19- ; Vd1- ; Vd2+                                 |
| 18 | Vd1                  | FSClowSSClow; CD3+ ; CD19- ; Vd1+ ; Vd2-                                 |
| 19 | B cells              | FSClowSSClow; CD3- ; CD19+                                               |
| 20 | B Naïve              | FSClowSSClow; CD3- ; CD19+ ; CD27- ; IgD+                                |
| 21 | Bmem                 | FSClowSSClow; CD3- ; CD19+ ; IgD-                                        |
| 22 | CD27- Bmem           | FSClowSSClow; CD3- ; CD19+ ; IgD- ; CD27-                                |
| 23 | CD27+ Bmem           | FSClowSSClow; CD3- ; CD19+ ; IgD- ; CD27+                                |
| 24 | IgM Bmem             | FSClowSSClow; CD3- ; CD19+ ; IgD- ; IgM+                                 |
| 25 | Natural effector     | FSClowSSClow; CD3- ; CD19+ ; CD27+ ; IgD+ ; IgM+                         |
| 26 | CD27+ IgM            | FSClowSSClow; CD3- ; CD19+ ; CD27+ ; IgD- ; IgM+                         |
| 27 | IgA Bmem             | FSClowSSClow; CD3- ; CD19+ ; IgD- ; IgA+ ; IgG-                          |
| 28 | CD27-IgA             | FSClowSSClow; CD3- ; CD19+ ; IgD- ; IgA+ ; IgG- ; CD27-                  |
| 29 | CD27+IgA             | FSClowSSClow; CD3- ; CD19+ ; IgD- ; IgA+ ; IgG- ; CD27+                  |
| 30 | IgG Bmem             | FSClowSSClow; CD3- ; CD19+ ; IgD- ; IgA- ; IgG+                          |
| 31 | CD27- Bmem           | FSClowSSClow; CD3- ; CD19+ ; IgD- ; IgA- ; IgG+ ; CD27-                  |
| 32 | CD27+ Bmem           | FSClowSSClow; CD3- ; CD19+ ; IgD- ; IgA- ; IgG+ ; CD27+                  |
| 33 | Transitional B cells | FSClowSSClow; CD3- ; CD19+ ; CD24+ ; CD38+                               |
| 34 | plasmablasts         | FSClowSSClow; CD3- ; CD19+ ; CD24- ; CD38++                              |
| 35 | NK cells             | FSClowSSClow; CD3- ; CD19- ; CD56+                                       |
| 36 | CD16+ NK             | FSClowSSClow; CD3- ; CD19- ; CD56+ ; CD16+                               |

Abbreviations: monos - monocytes; NonClass - non classical; Activ. -Activated; cDCs - conventional dendritic cells; pDCs - plasmacytoid dendritic cell, Vd2 - Vdelta2 expressing gamma-delta cell; Vd1 - Vdelta1 expressing gamma-delta cell.

**Table S5. Manually gated cell subset definitions panel 2.**

| #  | Population name   | Markers used for manual gating                                      |
|----|-------------------|---------------------------------------------------------------------|
| 37 | CD4+ T cells      | FSClowSSClow; CD3+ ; CD4+ ; CD8-                                    |
| 38 | CD4+ RTE          | FSClowSSClow; CD3+ ; CD4+ ; CD8- ; CD31+                            |
| 39 | CD4+ Naïve        | FSClowSSClow; CD3+ ; CD4+ ; CD8- ; CD45RA+ ; CD62L+                 |
| 40 | CD4+ Tmem         | FSClowSSClow; CD3+ ; CD4+ ; CD8- ; CD45RA-                          |
| 41 | Th1               | FSClowSSClow; CD3+ ; CD4+ ; CD8- ; CD45RA- ; CXCR3+                 |
| 42 | Th2               | FSClowSSClow; CD3+ ; CD4+ ; CD8- ; CD45RA- ; CCR4+ CCR6-            |
| 43 | Th17              | FSClowSSClow; CD3+ ; CD4+ ; CD8- ; CD45RA- ; CCR4+ CCR6+            |
| 44 | Th9               | FSClowSSClow; CD3+ ; CD4+ ; CD8- ; CD45RA- ; CCR4- CCR6+            |
| 45 | CD4+ Tmem CXCR5+  | FSClowSSClow; CD3+ ; CD4+ ; CD8- ; CD45RA- ; CXCR5+                 |
| 46 | CD4+ Tmem PD-1+   | FSClowSSClow; CD3+ ; CD4+ ; CD8- ; CD45RA- ; PD-1+                  |
| 47 | cTfh              | FSClowSSClow; CD3+ ; CD4+ ; CD8- ; CD45RA- ; CXCR5+ ; PD-1+         |
| 48 | CD4+ Tcm          | FSClowSSClow; CD3+ ; CD4+ ; CD8- ; CD45RA- ; CD62L+                 |
| 49 | CD4+ Tem          | FSClowSSClow; CD3+ ; CD4+ ; CD8- ; CD45RA- ; CD62L-                 |
| 50 | CD4+ Tem early    | FSClowSSClow; CD3+ ; CD4+ ; CD8- ; CD45RA- ; CD62L- ; CD27+ ; CD28+ |
| 51 | CD4+ Tem int      | FSClowSSClow; CD3+ ; CD4+ ; CD8- ; CD45RA- ; CD62L- ; CD27- ; CD28+ |
| 52 | CD4+ Tem late     | FSClowSSClow; CD3+ ; CD4+ ; CD8- ; CD45RA- ; CD62L- ; CD27- ; CD28- |
| 53 | CD4+ TemRA late   | FSClowSSClow; CD3+ ; CD4+ ; CD8- ; CD45RA+ ; CD62L- ; CD27- ; CD28- |
| 54 | Treg              | FSClowSSClow; CD3+ ; CD4+ ; CD8- ; CD25+ ; CD127-                   |
| 55 | Naïve Treg        | FSClowSSClow; CD3+ ; CD4+ ; CD8- ; CD25+ ; CD127- ; CD45RA+         |
| 56 | memory Treg       | FSClowSSClow; CD3+ ; CD4+ ; CD8- ; CD25+ ; CD127- ; CD45RA-         |
| 57 | CD8+ T cells      | FSClowSSClow; CD3+ ; CD4- ; CD8+                                    |
| 58 | CD8+ RTE          | FSClowSSClow; CD3+ ; CD4- ; CD8+ ; CD31+                            |
| 59 | CD8+ Naïve        | FSClowSSClow; CD3+ ; CD4- ; CD8+ ; CD45RA+ ; CD62L+                 |
| 60 | CD8+ Naïve Va7.2+ | FSClowSSClow; CD3+ ; CD4- ; CD8+ ; CD45RA+ ; CD62L+ ; Va7.2+        |
| 61 | CD8+ Tmem         | FSClowSSClow; CD3+ ; CD4- ; CD8+ ; CD45RA-                          |
| 62 | CD8+ Tmem Va7.2+  | FSClowSSClow; CD3+ ; CD4- ; CD8+ ; CD45RA- ; Va7.2+                 |
| 63 | CD8+ Tmem PD-1+   | FSClowSSClow; CD3+ ; CD4- ; CD8+ ; CD45RA- ; PD-1+                  |
| 64 | CD8+ Tcm          | FSClowSSClow; CD3+ ; CD4- ; CD8+ ; CD45RA- ; CD62L+                 |
| 65 | CD8+ Tem          | FSClowSSClow; CD3+ ; CD4- ; CD8+ ; CD45RA- ; CD62L-                 |
| 66 | CD8+ Tem early    | FSClowSSClow; CD3+ ; CD4- ; CD8+ ; CD45RA- ; CD62L- ; CD27+ ; CD28+ |
| 67 | CD8+ Tem int      | FSClowSSClow; CD3+ ; CD4- ; CD8+ ; CD45RA- ; CD62L- ; CD27- ; CD28+ |
| 68 | CD8+ Tem late     | FSClowSSClow; CD3+ ; CD4- ; CD8+ ; CD45RA- ; CD62L- ; CD27- ; CD28- |
| 69 | CD8+ TemRA late   | FSClowSSClow; CD3+ ; CD4- ; CD8+ ; CD45RA+ ; CD62L- ; CD27- ; CD28- |
| 70 | CD8+ Tmem CXCR3+  | FSClowSSClow; CD3+ ; CD4+ ; CD8- ; CD45RA- ; CXCR3+                 |

Abbreviations: RTE - recent thymic emigrant ; Tmem - memory T cells ; cTfh - circulating T follicular helper cell ; Tcm - Central memory T cells; Tem - Effector memory T cells; TemRA - CD45RA+ Tem cell; Treg - Regulatory T cell.
